# Supplementary material
Source: PubMed Central journal article supplement (PMC4738100)
Supplement: NIHMS749836-supplement-01.pdf [file NIHMS749836-supplement-01.pdf]

**Recovery of Elemental Tellurium Nanoparticles by the Reduction of Tellurium Oxyanions  
in a Methanogenic Microbial Consortium**

**Supporting Information**

*Adriana Ramos-Ruiz, Jim A. Field, Jean V. Wilkening, and Reyes Sierra-Alvarez\**

Department of Chemical and Environmental Engineering, University of Arizona

P.O. Box 210011, Tucson, Arizona 85721-0011, USA

**Number of pages:** 9

**Number of figures:** 5

**\* Corresponding author:** Reyes Sierra-Alvarez, Phone: 1-520-626 2896, Fax: +1-520-621  
6048; E-mail: rsierra@email.arizona.edu.

## Chemicals

Te<sup>IV</sup> as Na<sub>2</sub>TeO<sub>3</sub>, Te<sup>VI</sup> as K<sub>2</sub>TeO<sub>4</sub>·0.5 H<sub>2</sub>O (the stoichiometry of the molecular water was based on comparing the Te concentration of the salt with that of a Te standard), 9,10-anthraquinone-2,6- disulfonic acid (AQDS) disodium salt (≥ 98% purity), riboflavin (RF), and hydroxocobalamin, acetate salt were purchased from Sigma-Aldrich (St. Louis, MO, USA), 2-hydroxy-1,4-napthoquinone (lawsone) was obtained from TCI (Tokio Chemical Industry Co, LTD, Tokio, JP), ammonium pyrrolidinedithiocarbamate (APCD) was acquired from Fluka analytical (Sigma-Aldrich, St. Louis, MO, USA), and the Te standard (1000 ppm in 3% HNO<sub>3</sub>) was purchased from RICCA Chemical Company (Arlington, TX, USA).

## Mineral Basal Medium Used in the Batch Assays

The basal medium used in the batch bioassays consisted of the following macronutrients (in mg L<sup>-1</sup> final medium concentration): K<sub>2</sub>HPO<sub>4</sub> (25); CaCl<sub>2</sub>·2 H<sub>2</sub>O (10); MgCl<sub>2</sub>·6 H<sub>2</sub>O (100); NH<sub>4</sub>Cl (7); and yeast extract (YE) (1). The medium also contained the following trace elements (in µg L<sup>-1</sup> final medium concentration): H<sub>3</sub>BO<sub>3</sub> (10); FeCl<sub>2</sub>·4 H<sub>2</sub>O (400); ZnCl<sub>2</sub> (10); MnCl<sub>2</sub>·4 H<sub>2</sub>O (10); (NH<sub>4</sub>)<sub>6</sub>Mo<sub>7</sub>O<sub>24</sub>·4 H<sub>2</sub>O (18); AlCl<sub>3</sub>·6 H<sub>2</sub>O (18); CoCl<sub>2</sub>·6 H<sub>2</sub>O (400); NiCl<sub>2</sub>·6 H<sub>2</sub>O (10); CuCl<sub>2</sub>·2 H<sub>2</sub>O (6); NaSeO<sub>3</sub>·5 H<sub>2</sub>O (20); EDTA (200); and resazurin (40). The pH of the medium was adjusted to 7.0-7.2 and then 2.5 g L<sup>-1</sup> of sodium bicarbonate (NaHCO<sub>3</sub>) was added to buffer the pH of the media. Te<sup>IV</sup> and Te<sup>VI</sup> were provided in the form of Na<sub>2</sub>TeO<sub>3</sub> and K<sub>2</sub>TeO<sub>4</sub> 0.5 H<sub>2</sub>O; respectively.

## Te Speciation in Liquid Samples (Te<sup>IV</sup> and Te<sup>VI</sup>)

An aliquot taken from the filtrate obtained in the filtration step, 1 mL of an ammonium pyrrolidinedithiocarbamate (APDC) stock solution to reach a final concentration of 0.05% (m/v),

along with 0.5 mL of HNO<sub>3</sub> (70% wt. for a final concentration of 0.3 M) were added to 25 mL volumetric flasks. The mixtures were allowed to settle for ten minutes before passing them through the solid phase extraction cartridges (SampliQ C18 ODS, Agilent, Santa Clara, CA, USA), in order to allow for the formation of the Te<sup>IV</sup>-APDC chelate. Before passing the sample through the SPE cartridges, the columns were preconditioned by passing 3 mL of methanol (HPLC grade) through, at a volumetric flow rate of one mL min<sup>-1</sup> to remove impurities after that, 3 mL HNO<sub>3</sub> (2% v/v) were used to equilibrate the pH of the cartridges. A Visiprep<sup>TM</sup> SPE vacuum manifold (Supelco, Sigma-Aldrich, St. Louis, MO, USA) was used to load 12 cartridges at the same time. Three mL of the mixture sample-APDC-HNO<sub>3</sub> was then passed through the cartridges at a rate of 1 mL min<sup>-1</sup>, Te<sup>IV</sup>-APDC chelate got retained in the cartridges while Te<sup>VI</sup> was collected in the effluent of the columns. The effluent was then analyzed with an ICP-OES, as mentioned above, for Te<sup>VI</sup> and the amount of Te<sup>IV</sup> was obtained as the difference between the concentration of total dissolved tellurium and that of Te<sup>VI</sup>.

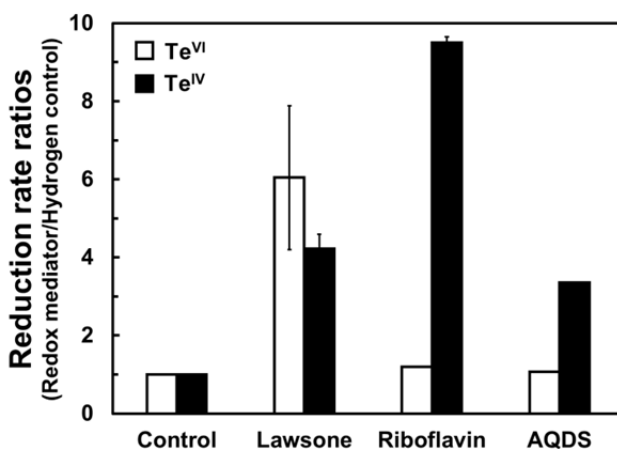

**Figure S1.** Comparison of the relative rates of tellurium reduction using different redox mediators (RMs) at a 1:1 molar ratio (Te:RM) and H<sub>2</sub> as an electron donor (hydrogen control), in comparison to the rate of reduction in the presence of H<sub>2</sub> without added RM.

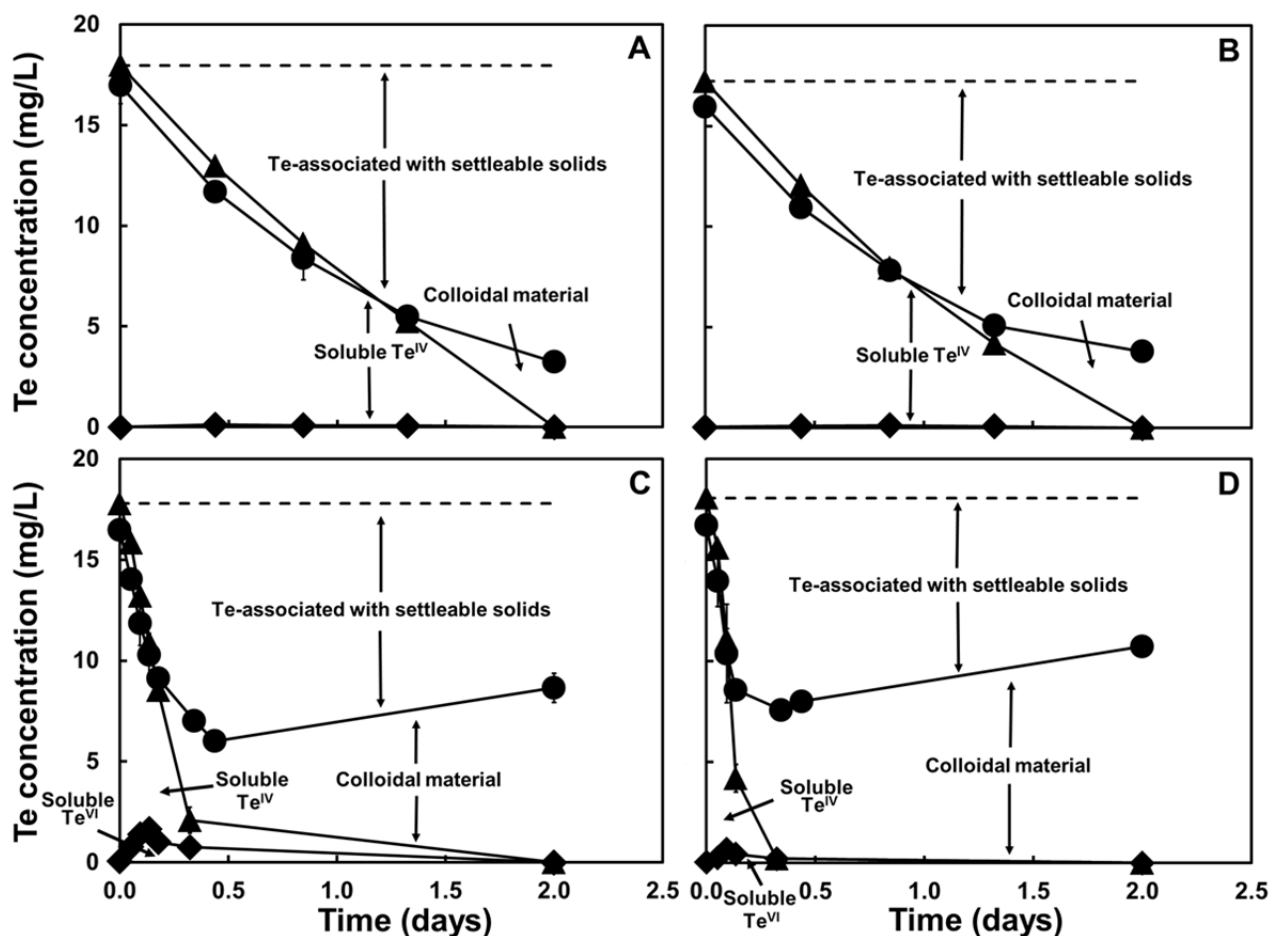

**Figure S2.** Distribution of Te<sup>IV</sup> between the phases of the system using H<sub>2</sub> as exogenous electron donor and different redox mediators (RM). **Panel A**, sludge without external electron donor or RM. **Panel B**, sludge with H<sub>2</sub> as electron donor and no RM. **Panel C**, sludge amended with H<sub>2</sub> and lawsone as redox mediator at a molar ratio 1:1 (Te:RM). **Panel D**, sludge amended with H<sub>2</sub> and RF as RM at a molar ratio 1:1 (Te:RM). Legend: (- - -), initial concentration of Te in the liquid phase; (●) sum of colloidal and dissolved Te in the liquid phase; (▲) total dissolved Te; (◆) dissolved Te<sup>VI</sup>.

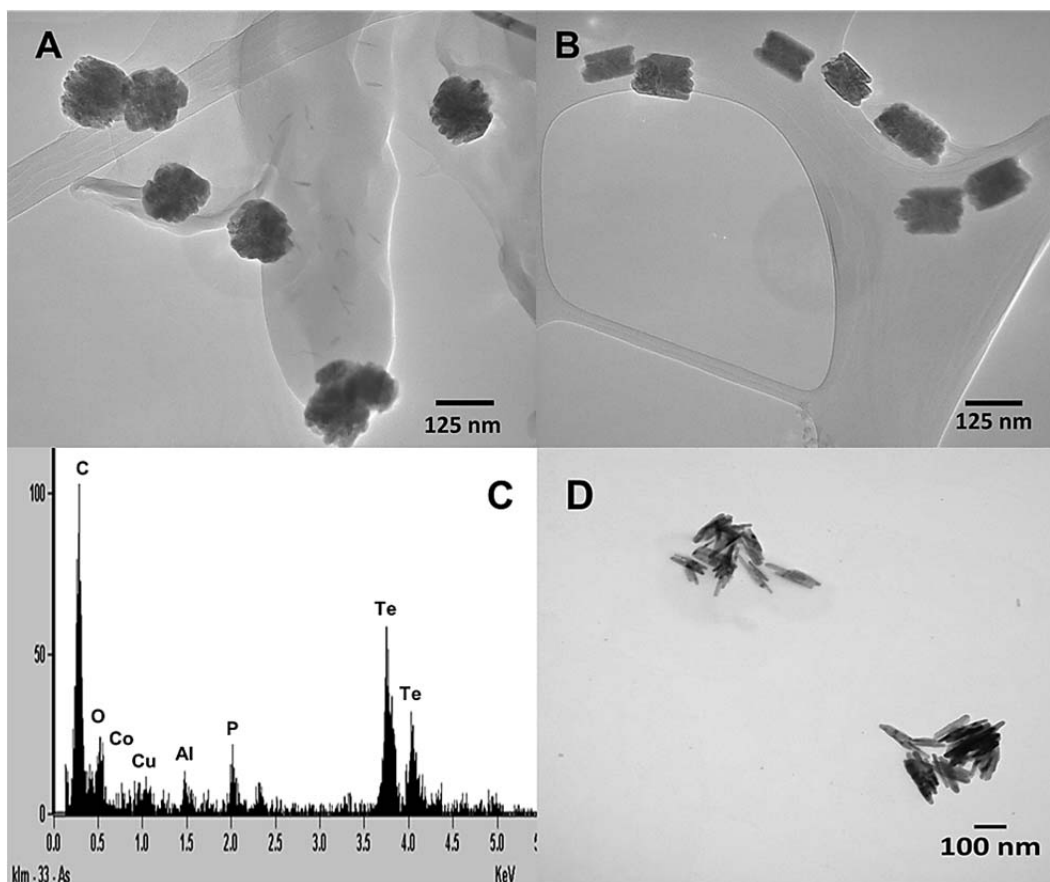

**Figure S3.** TEM and EDS images of the Te<sup>0</sup> nanoparticles formed outside the anaerobic granules when Te<sup>VI</sup> was amended as Te source. **Panel A**, Spherical shape obtained in the endogenous control. **Panel B**, Bundles of needle-like NPs produced in the systems amended with H<sub>2</sub> as electron donor. **Panel C**, EDS spectra for the NPs produced in the endogenous control. **Panel D**, Clusters of disorderly arranged needle-like NPs produced in the systems supplied with H<sub>2</sub> as electron donor and lawsone (Te:RM 1:1 molar ratio).

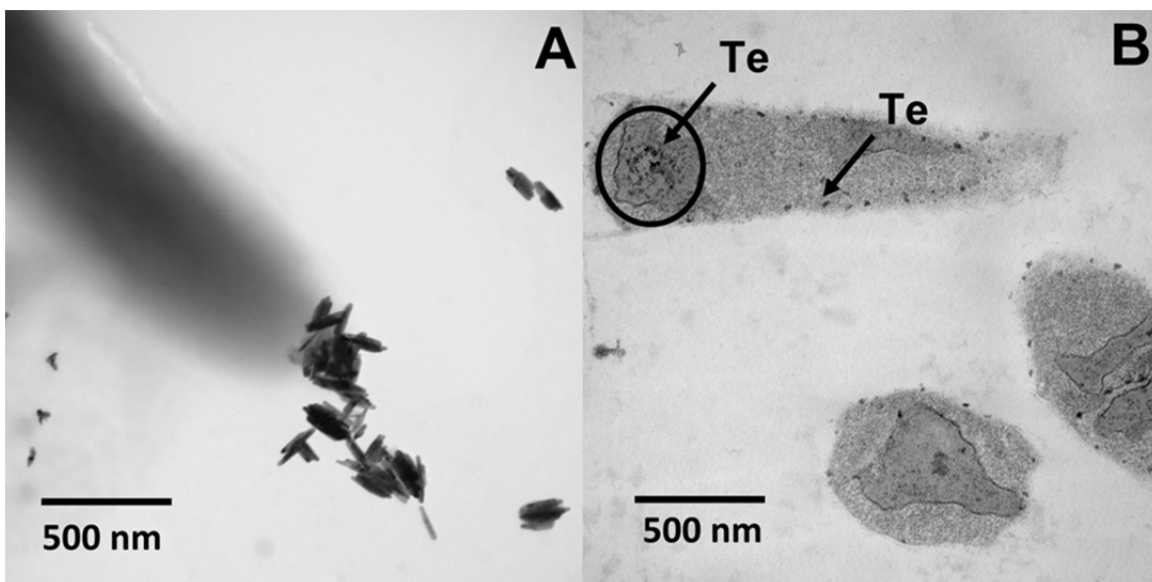

**Figure S4.** Formation of extracellular and intracellular  $\text{Te}^0$  nanoparticles produced by the anaerobic granules using  $\text{Te}^{\text{IV}}$  as the initial source of Te with  $\text{H}_2$  as external source of electrons, in the presence or absence of riboflavin. **Panel A**,  $\text{Te}^0$  NPs formed extracellularly when the bioassays were amended with  $\text{H}_2$  as electron donor and riboflavin as RM. **Panel B**,  $\text{Te}^0$  NPs formed intracellularly when the systems were amended with  $\text{H}_2$  as electron donor with no RM.

### Description of the Statistical Analysis Performed to the Rates of Reduction Data

In order to investigate if the differences observed between the rates of reduction of both Te oxyanions in the systems amended with RM and those of the systems lacking a redox mediating compound are statistically significant, we performed right-tailed hypothesis tests using the t-student distribution as the test statistics with a significance level  $\alpha=0.05$ .

#### 1- Null Hypothesis:

$$H_0 := \mu_1 - \mu_2 \leq 0$$

where:

$\mu_1$  = rate of Te reduction in the system containing RM and H<sub>2</sub> as electron donor

$\mu_2$  = rate of Te reduction in the control lacking RM with H<sub>2</sub> as electron donor

## 2- Alternative Hypothesis:

$$H_a: \mu_1 - \mu_2 \geq 0$$

## 3- Test Statistics (t)

$$t = \frac{\bar{x}_1 - \bar{x}_2}{s \sqrt{\frac{1}{n_1} + \frac{1}{n_2}}}$$

$$s^2 = \frac{\sum(x_1 - \bar{x}_1)^2 + \sum(x_2 - \bar{x}_2)^2}{n_1 + n_2 - 2}$$

where:

$\bar{x}_1$  = mean of the Te reduction rate in the assay containing RM and H<sub>2</sub> as electron donor (sample)

$\bar{x}_2$  = mean of the Te reduction rate in the control lacking RM with H<sub>2</sub> as electron donor (sample)

s = standard error

$n_1$  = size of the sample obtained from the systems containing RM

$n_2$  = size of the sample obtained from the systems lacking RM

## 4- Compare the Test Statistic with t-critical Value Giving a Significance Level of $\alpha=0.05$

If the test statistic was larger than the t-critical value then, the null hypothesis was rejected and the alternative was accepted.

In all the hypothesis tests performed with our data, the estimated p-values (obtained with the test statistics) were smaller than 0.005, which indicates that there is a strong statistical

significance in the observed differences between the reduction rates obtained in the different systems.

### **Role of Sulfide in Biomass on Te<sup>IV</sup> Reduction**

In order to determine the amount of sulfide released from the biomass to the S-free medium at different times (covering a typical incubation period used in the Te<sup>IV</sup> reduction experiments of 0-5 days) and its potential effect on the reduction of Te in our systems, we performed batch experiments using only 100 mL of the mineral medium (described in page S2) and 1.5 g VSS L<sup>-1</sup> of the granular sludge. We incubated the bottles under the same experimental conditions used in the manuscript to determine the initial concentration of sulfide in the medium after 2 and 5 days of incubation. The dissolved sulfide content was 0,  $8.9 \times 10^{-3} \pm 6.7 \times 10^{-4}$  mM S<sup>2-</sup>, and  $7.7 \times 10^{-3} \pm 9.6 \times 10^{-4}$  mM S<sup>2-</sup> after 0, 2, and 5 days of incubation, respectively. According to the Te<sup>IV</sup> reduction reaction using S<sup>2-</sup> as the electron donor (eq. 1), two moles of S<sup>2-</sup> would be required to reduce one mole of Te<sup>IV</sup>. Therefore, the amount of S<sup>2-</sup> found in the medium will be able to reduce only between 2.5 to 2.9% of the total Te<sup>IV</sup> (0.156 mM) amended to the system.

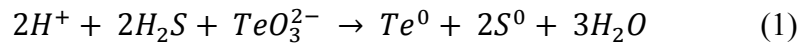

H<sub>2</sub>S can potentially be recycled from S<sup>0</sup>, thus to account for the effect of a possible rapid reduction of S<sup>0</sup> to S<sup>2-</sup> by the elemental sulfur-reducing bacteria (commonly found in anaerobic granular sludge) on the reduction of Te<sup>IV</sup>, a typical batch experiment was carried out using 100 mL of mineral media, 10.7 mM H<sub>2</sub> L<sub>liq</sub>, 1.5 g VSS L<sup>-1</sup>, 0.156 mM Te<sup>IV</sup>, and two different amounts of S<sup>2-</sup> (0.007 and 0.035 mM). The sum of the added S<sup>2-</sup> and the background S<sup>2-</sup> concentration expected after 5 days ( $7.7 \times 10^{-3}$  mM) exceeded 1.9- and 5.5-fold the background



$S^{2-}$  concentration after 5 days of incubation. The time course of  $Te^{IV}$  reduction is shown in Figure S5. No important effect was observed except for a small increase in the  $Te^{IV}$  reduction rate in the assay supplied with  $0.035\text{ mM } S^{2-}$ . These results provide conclusive evidence that the background  $S^{2-}$  production by the biomass did not contribute in a significant fashion to the rate of  $Te^{IV}$  reduction. It is also important to note that according to the  $E^0$  of the couple  $HTeO_3^-/Te^0$  ( $0.196\text{ V}$ ), the reduction of  $Te^{IV}$  is highly bioenergetically favorable over sulfate reduction ( $-0.217\text{ V}$ ).

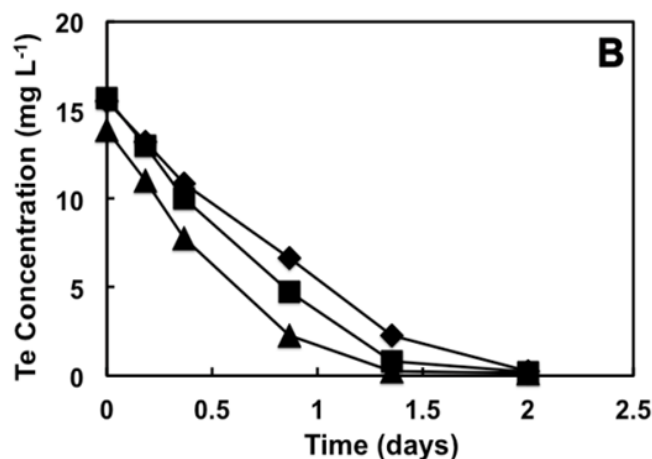

**Figure S5.** Time course of  $Te^{IV}$  reduction in batch assays amended with low levels of sulfide ( $S^{2-}$ ). Biological reduction of  $Te^{IV}$  ( $0.156\text{ mM as Te}$ ) in assays supplied with  $H_2$  as the electron donating substrate,  $1.5\text{ g VSS L}^{-1}$  of granular sludge, and two different levels of  $S^{2-}$  selected to provide a total concentration of  $S^{2-}$  that is approximately 1.9- to 5.5-fold times higher than the background of sludge-derived  $S^{2-}$  in sulfur-free mineral medium after 5 days of incubation. Legends: (♦) control incubated in S-free mineral medium, (■) assay supplied with  $0.007\text{ mM } S^{2-}$ , (▲) assay supplied with  $0.035\text{ mM } S^{2-}$ .
